# Supplementary material for: Thermal runaway features of large-format power lithium-ion cells under various thermal abuse patterns and capacities
Source: Royal Society of Chemistry journal article supplement (doi:10.1039/d3ra06425e), 2023-01-01
Supplement: d3ra06425e1.pdf [file d3ra06425e1.pdf]

Fig. S1 represents the according results of the mean flame temperature for cells with various capacities during thermal runaway. Identical to the flame morphology result, the maximum value of the mean flame temperature for these cells still emerges at the initial stage of combustion, which could climb above 4000 °C. With the increase of the cell capacity, it is shown that the lasting time of combustion reduces gradually, with values of 108, 75, and 53 s corresponding to the 60, 150, and 180 Ah cells separately.

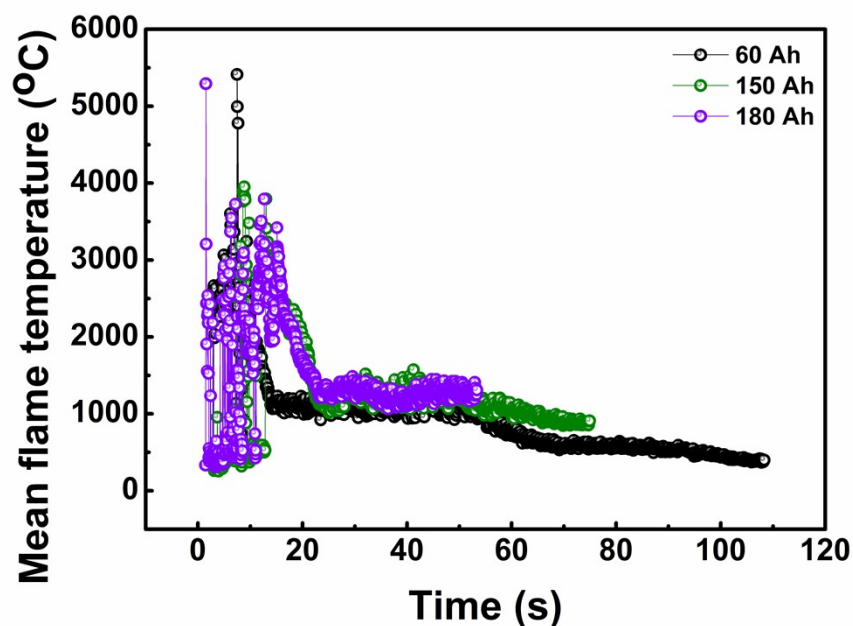

Fig. S1. The variations of the mean flame temperature in the process of thermal runaway for 60, 150, and 180 Ah cells under the effect of an electric heating oven
